# Supplementary material for: Infrared molecular fingerprinting of blood-based liquid biopsies for the detection of cancer
Source: eLife. 2021 Oct 26;10:e68758. doi: 10.7554/eLife.68758 (PMC8547961; doi:10.7554/eLife.68758)
Supplement: Figure 1—source data 1. — All the following analyses were carried out on subsets of this participant pool; see also other source data files for further details. When selecting the sub-cohorts, special care was taken to match the case and reference cohorts separately, for each question – according to age, gender, and body mass index (BMI) – in order to avoid possible bias in patient selection. [file elife-68758-fig1-data1.xlsx]

## Sheet: Tabelle1
Figure 1-source data 1 | Breakdown of the overall participant pool used within the study. All the following analyses were carried out on subsets of this participant pool; see also other upplementary Tables for further details. When selecting the sub-cohorts, special care was taken to match the case and reference cohorts separately, for each question - according to age, gender and body mass index …
Characteristics of the main groups of the participant pool:
Group	# of Individuals	Age	Gender	BMI
		(years ± std)	(% female)	(kg/m2 ± std)
Lung cancer	214	67 ± 10	42	26 ± 5
Breast cancer	161	60 ± 14	100	26 ± 5
Bladder cancer	118	71 ± 11	24	25 ± 4
Prostate cancer	278	68 ± 8	0	27 ± 4
Cancer-free	1156	60 ± 15	42	26 ± 5
TNM classification T
Group	Ta/Tis/T0	T1	T2	T3	T4	Unknown
Lung cancer	n/a	42	75	26	55	16
Breast cancer	7	64	60	11	8	11
Bladder cancer	52	23	20	12	2	9
Prostate cancer	n/a	2	137	78	3	58
TNM classification N
Group		N0	N1	N2	N3	Unknown
Lung cancer		85	28	43	36	22
Breast cancer		94	31	11	2	23
Bladder cancer		53	3	4	0	58
Prostate cancer		161	16	0	0	101
TNM classification M
Group		M0	M1			Unknown
Lung cancer		109	45			60
Breast cancer		102	7			52
Bladder cancer		56	1			61
Prostate cancer		167	12			99
Organ-specific comorbidities and benign conditions of cancer-free individuals:
# of subjects with no related conditions	# of subjects with benign prostate hyperplasia (BPH)	# of subjects with chronic obstructive pulmonary disease (COPD)	# of subjects with lung hamartoma	# of subjects with pneumonia
						# of subjects with asthma
635	310	130	25	1		55
