# Supplementary material for: Infrared molecular fingerprinting of blood-based liquid biopsies for the detection of cancer
Source: eLife. 2021 Oct 26;10:e68758. doi: 10.7554/eLife.68758 (PMC8547961; doi:10.7554/eLife.68758)
Supplement: Figure 2—figure supplement 1—source data 1. [file elife-68758-fig2-figsupp1-data1.xlsx]

## Sheet: Tabelle1
Figure 2-source data 2 | Characteristics of the matched groups utilized for the analysis presented in Figure 2–figure supplement 1 .
Characteristics of matched groups of individuals comparing samples from non-symptomatic individuals collected at different clinics:
Groups from 3 different clinics
Group	# of Individuals	Age	Gender	BMI
		(years ± std)	(% female)	(kg/m2 ± std)
Site 1	44	60 ± 8	64	25 ± 4
Site 2	44	59 ± 8	70	26 ± 5
Site 3	44	60 ± 8	64	26 ± 5
