# Supplementary material for: Infrared molecular fingerprinting of blood-based liquid biopsies for the detection of cancer
Source: eLife. 2021 Oct 26;10:e68758. doi: 10.7554/eLife.68758 (PMC8547961; doi:10.7554/eLife.68758)
Supplement: Figure 2—figure supplement 2—source data 1. [file elife-68758-fig2-figsupp2-data1.xlsx]

## Sheet: Tabelle1
Figure 2-source data 3 | Characteristics of the matched groups utilized for the analysis presented in Figure 2-figure supplement 2.
Characteristics of matched groups of individuals comparing the performance between serum and plasma:
Lung cancer
Group	# of Individuals	Age	Gender	BMI	# of subjects with
		(years ± std)	(% female)	(kg/m2 ± std)	COPD
Cases vs	80	70 ± 9	45	26 ± 5	21
Mixed	61	70 ± 9	44	25 ± 5	34
Prostate cancer
Group	# of Individuals	Age	Gender	BMI
		(years ± std)	(% female)	(kg/m2 ± std)
Cases vs	69	67 ± 8	0	27 ± 4
Mixed	67	67 ± 8	0	27 ± 4
