# Supplementary material for: Infrared molecular fingerprinting of blood-based liquid biopsies for the detection of cancer
Source: eLife. 2021 Oct 26;10:e68758. doi: 10.7554/eLife.68758 (PMC8547961; doi:10.7554/eLife.68758)
Supplement: Figure 2—source data 1. [file elife-68758-fig2-data1.xlsx]

## Sheet: Tabelle1
Figure 2-source data 1 | Characteristics of the matched groups of individuals utilized for the analysis as presented in Table 1, Figure 2 and Figure 3, panels a-c.
Characteristics of matched individuals in groups used for lung-cancer-related analysis:
Group	# of Individuals	Age	Gender	BMI	# of subjects with
		(years ± std)	(% female)	(kg/m2 ± std)							AUC
					COPD	Hamart.	Pneumon.	Asthma
Cases vs	214	67 ± 10	42	26 ± 5	68	0	0	8
Non-symptomatic	193	67 ± 10	41	26 ± 5	0	0	0	0			0.89 ± 0.05
Symptomatic	143	66 ± 10	46	26 ± 6	103	23	1	21			0.74 ± 0.07
Mixed	208	67 ± 10	42	26 ± 6	96	9	1	14			0.77 ± 0.06
Characteristics of matched groups of individuals used for breast-cancer-related analysis:
Group	# of Individuals	Age	Gender	BMI
		(years ± std)	(% female)	(kg/m2 ± std)							AUC
Cases vs	161	60 ± 14	100	26 ± 5
Non-symptomatic	161	59 ± 13	100	25 ± 5							0.88 ± 0.06
Characteristics of matched groups of individuals used for bladder-cancer-related analysis:
Group	# of Individuals	Age	Gender	BMI
		(years ± std)	(% female)	(kg/m2 ± std)							AUC
Cases vs	118	71 ± 11	24	25 ± 4
Non-symptomatic	118	70 ± 10	20	26 ± 6							0.79 ± 0.09
Characteristics of matched groups used for prostate-cancer-related analysis:
Group	# of Individuals	Age	Gender	BMI	# of subjects with BPH
		(years ± std)	(% female)	(kg/m2 ± std)							AUC
Cases vs	278	68 ± 8	0	27 ± 4	0
Non-symptomatic	278	61 ± 14	0	27 ± 4	0						0.78 ± 0.06
Mixed	278	68 ± 8	0	27 ± 4	136						0.75 ± 0.06
