# Supplementary material for: Infrared molecular fingerprinting of blood-based liquid biopsies for the detection of cancer
Source: eLife. 2021 Oct 26;10:e68758. doi: 10.7554/eLife.68758 (PMC8547961; doi:10.7554/eLife.68758)
Supplement: Figure 2—source data 3. [file elife-68758-fig2-data3.xlsx]

## Sheet: Sheet1
Figure 2-source data 5 | Potential impact of clinical site to classification performance
AUCs of the classification cancer vs. mixed references (MR) collected at 3 different clinics
	LuCa vs.	BrCa vs.	BlCa vs.	PrCa vs.
MR (Study Site 1)	0.96 ± 0.02	0.71 ± 0.07	0.98 ± 0.01	0.77 ± 0.12
MR (Study Site 2)	0.72 ± 0.05	0.88 ± 0.08	0.84 ± 0.09	0.62 ± 0.20
MR (Study Site 3)	0.92 ± 0.03	0.86 ± 0.04	0.77 ± 0.06	0.74 ± 0.04
