# Supplementary material for: Infrared molecular fingerprinting of blood-based liquid biopsies for the detection of cancer
Source: eLife. 2021 Oct 26;10:e68758. doi: 10.7554/eLife.68758 (PMC8547961; doi:10.7554/eLife.68758)
Supplement: Figure 3—figure supplement 1—source data 1. [file elife-68758-fig3-figsupp1-data1.xlsx]

## Sheet: Tabelle1
Figure 3-source data 2 | Characteristics of the matched groups utilized for the analysis presented in Figure 3-figure supplement 1.
Characteristics of matched groups of individuals examining the effect of organ-specific benign conditions:
Asthma
Group	# of Individuals	Age	Gender	BMI	# of subjects with
		(years ± std)	(% female)	(kg/m2 ± std)	COPD	AUC
Non-symptomatic vs	35	55 ± 15	60	24 ± 3	0
Asthma	35	56 ± 14	60	28 ± 6	2	0.58 ± 0.2
Lung Hamartoma
Group	# of Individuals	Age	Gender	BMI	# of subjects with
		(years ± std)	(% female)	(kg/m2 ± std)	COPD	AUC
Non-symptomatic vs	25	67 ± 8	36	28 ± 10	0
Hamartoma	25	67 ± 8	36	26 ± 4	5	0.64 ± 0.2
COPD
Group	# of Individuals	Age	Gender	BMI	# of subjects with
		(years ± std)	(% female)	(kg/m2 ± std)	COPD	AUC
Non-symptomatic vs	115	68 ± 8	41	27 ± 7	0
COPD	118	68 ± 8	43	25 ± 6	118	0.88 ± 0.07
Lung cancer
Group	# of Individuals	Age	Gender	BMI	# of subjects with
		(years ± std)	(% female)	(kg/m2 ± std)	COPD	AUC
Non-symptomatic vs	193	67 ± 10	41	26 ± 5	0
Lung cancer	214	67 ± 10	42	26 ± 5	68	0.89 ± 0.05
BPH
Group	# of Individuals	Age	Gender	BMI
		(years ± std)	(% female)	(kg/m2 ± std)		AUC
Non-symptomatic vs	187	68 ± 9	0	27 ± 5
BPH	310	69 ± 9	0	27 ± 4		0.73 ± 0.08
Prostate cancer
Group	# of Individuals	Age	Gender	BMI
		(years ± std)	(% female)	(kg/m2 ± std)		AUC
Non-symptomatic vs	278	61 ± 14	0	27 ± 5
Prostate cancer	278	68 ± 8	0	27 ± 4		0.78 ± 0.06
