# Supplementary material for: Infrared molecular fingerprinting of blood-based liquid biopsies for the detection of cancer
Source: eLife. 2021 Oct 26;10:e68758. doi: 10.7554/eLife.68758 (PMC8547961; doi:10.7554/eLife.68758)
Supplement: Figure 3—source data 1. [file elife-68758-fig3-data1.xlsx]

## Sheet: Tabelle1
Figure 3-source data 1 | Characteristics of the matched groups utilized for the analysis presented in Figure 3, panels d and e.
Characteristics of matched groups of individuals used for the multiclass classification analysis between different cancer entities:
Female
Group	# of Individuals	Age	Gender	BMI
		(years ± std)	(% female)	(kg/m2 ± std)
Bladder cancer	28	72 ± 10	100	27 ± 6
Lung cancer	28	73 ± 11	100	24 ± 4
Breast cancer	28	74 ± 11	100	24 ± 4
Male
Group	# of Individuals	Age	Gender	BMI
		(years ± std)	(% female)	(kg/m2 ± std)
Bladder cancer	90	70 ± 11	0	26 ± 5
Lung cancer	90	70 ± 11	0	26 ± 4
Prostate cancer	90	70 ± 10	0	27 ± 4
