# Supplementary material for: Infrared molecular fingerprinting of blood-based liquid biopsies for the detection of cancer
Source: eLife. 2021 Oct 26;10:e68758. doi: 10.7554/eLife.68758 (PMC8547961; doi:10.7554/eLife.68758)
Supplement: Figure 4—figure supplement 1—source data 1. [file elife-68758-fig4-figsupp1-data1.xlsx]

## Sheet: Tabelle1
Figure 4-source data 1 | Characteristics of the matched groups utilized for the analysis presented in Figure 4-figure supplement 1.
Characteristics of matched groups used for the analysis of lung cancer examining the effect of the COPD status:
COPD-negative
Group	# of Individuals	Age	Gender	BMI	# of subjects with
		(years ± std)	(% female)	(kg/m2 ± std)							AUC
					COPD	Hamart.	Pneumon.	Asthma
Cases vs	119	69 ± 10	45	25 ± 5	0	0	0	5
References	119	69 ± 10	44	26 ± 6	0	0	0	7			0.81 ± 0.09
COPD-positive
Group	# of Individuals	Age	Gender	BMI	# of subjects with
		(years ± std)	(% female)	(kg/m2 ± std)							AUC
					COPD	Hamart.	Pneumon.	Asthma
Cases vs	60	68 ± 8	38	27 ± 5	60	0	0	1
References	60	68 ± 8	38	26 ± 6	60	0	0	5			0.71 ± 0.14
