# Supplementary material for: Infrared molecular fingerprinting of blood-based liquid biopsies for the detection of cancer
Source: eLife. 2021 Oct 26;10:e68758. doi: 10.7554/eLife.68758 (PMC8547961; doi:10.7554/eLife.68758)
Supplement: Figure 4—source data 1. [file elife-68758-fig4-data1.xlsx]

## Sheet: Tabelle1
Figure 4-source data 2 |Characteristics of the matched groups utilized for the analysis presented in Figure 4
Characteristics of matched groups of individuals examining the effect of organ-specific benign conditions:
Lung cancer
and Hamartoma
Group	# of Individuals	Age	Gender	BMI	# of subjects with
		(years ± std)	(% female)	(kg/m2 ± std)	COPD	AUC
Hamartoma vs	25	67 ± 8	36	26 ± 3	5
LuCa cases	25	67 ± 8	36	26 ± 4	9	0.86 ± 0.19
References	25	67 ± 8	36	27 ± 10	0	0.64 ± 0.26
Prostate cancer
and BPH
Group	# of Individuals	Age	Gender	BMI
		(years ± std)	(% female)	(kg/m2 ± std)		AUC
BPH vs	278	68 ± 8	0	27 ± 4
PrCa cases	278	68 ± 8	0	27 ± 4		0.7 ± 0.06
References	187	68 ± 9	0	27 ± 5		0.72 ± 0.07
