# Supplementary material for: Infrared molecular fingerprinting of blood-based liquid biopsies for the detection of cancer
Source: eLife. 2021 Oct 26;10:e68758. doi: 10.7554/eLife.68758 (PMC8547961; doi:10.7554/eLife.68758)
Supplement: Figure 5—source data 1. [file elife-68758-fig5-data1.xlsx]

## Sheet: Tabelle1
Figure 5-source data 1 | Characteristics of the matched groups utilized for the analysis presented in Figure 5, panel a-d, a´-d´ and a´´-d´´.
Characteristics of matched groups of individuals for the lung-cancer analysis examining the effect of tumor size:
TNM class T1
Group	# of Individuals	Age	Gender	BMI	# of subjects with
		(years ± std)	(% female)	(kg/m2 ± std)							AUC
					COPD	Hamart.	Pneumon.	Asthma
Cases vs	42	68 ± 9	52	27 ± 6	18	0	0	0
Non-symptomatic	42	68 ± 9	52	25 ± 4	0	0	0	0			0.79 ± 0.17
Mixed	42	68 ± 9	52	27 ± 5	24	0	0	5			0.5 ± 0.18
TNM class T2
Group	# of Individuals	Age	Gender	BMI	# of subjects with
		(years ± std)	(% female)	(kg/m2 ± std)							AUC
					COPD	Hamart.	Pneumon.	Asthma
Cases vs	56	70 ± 9	45	26 ± 5	14	0	0	2
Non-symptomatic	56	69 ± 9	44	25 ± 4	0	0	0	0			0.8 ± 0.14
Mixed	56	70 ± 9	45	26 ± 5	36	0	1	6			0.63 ± 0.17
TNM class T3
Group	# of Individuals	Age	Gender	BMI	# of subjects with
		(years ± std)	(% female)	(kg/m2 ± std)							AUC
					COPD	Hamart.	Pneumon.	Asthma
Cases vs	19	67 ± 9	47	26 ± 5	5	0	0	2
Non-symptomatic	19	67 ± 9	47	27 ± 12	0	0	0	0			0.83 ± 0.25
Mixed	29	67 ± 8	48	25 ± 5	23	0	0	2			0.66 ± 0.29
TNM class T4
Group	# of Individuals	Age	Gender	BMI	# of subjects with
		(years ± std)	(% female)	(kg/m2 ± std)							AUC
					COPD	Hamart.	Pneumon.	Asthma
Cases vs	46	68 ± 10	33	24 ± 4	16	0	0	0
Non-symptomatic	45	68 ± 10	31	27 ± 8	0	0	0	0			0.88 ± 0.11
Mixed	46	68 ± 10	33	25 ± 5	31	0	0	4			0.73 ± 0.14
Characteristics of matched groups of individuals for the breast-cancer analysis examining the effect of tumor size:
TNM class T1
Group	# of Individuals	Age	Gender	BMI							AUC
		(years ± std)	(% female)	(kg/m2 ± std)
Cases vs	64	61 ± 12	100	25 ± 5
Non-symptomatic	63	60 ± 12	100	25 ± 4							0.85 ± 0.10
TNM class T2
Group	# of Individuals	Age	Gender	BMI							AUC
		(years ± std)	(% female)	(kg/m2 ± std)
Cases vs	60	56 ± 13	100	25 ± 5
Non-symptomatic	60	56 ± 13	100	25 ± 5							0.86 ± 0.13
TNM class T3
Group	# of Individuals	Age	Gender	BMI							AUC
		(years ± std)	(% female)	(kg/m2 ± std)
Cases vs	11	68 ± 15	100	29 ± 5
Non-symptomatic	11	68 ± 15	100	27 ± 4							0.99 ± 0.07
Characteristics of matched groups of individuals for the bladder-cancer analysis examining the effect of tumor size:
TNM class T1
Group	# of Individuals	Age	Gender	BMI							AUC
		(years ± std)	(% female)	(kg/m2 ± std)
Cases vs	23	71 ± 10	22	26 ± 4
Non-symptomatic	92	70 ± 9	17	26 ± 5							0.61 ± 0.21
TNM class T2
Group	# of Individuals	Age	Gender	BMI							AUC
		(years ± std)	(% female)	(kg/m2 ± std)
Cases vs	20	73 ± 10	40	25 ± 4
Non-symptomatic	60	72 ± 9	38	26 ± 4							0.75 ± 0.21
TNM class T3
Group	# of Individuals	Age	Gender	BMI							AUC
		(years ± std)	(% female)	(kg/m2 ± std)
Cases vs	12	68 ± 11	16	25 ± 3
Non-symptomatic	48	68 ± 11	16	27 ± 4							0.84 ± 0.16
Characteristics of matched groups of individuals for the prostate-cancer analysis examining the effect of the tumor size:
TNM class T2
Group	# of Individuals	Age	Gender	BMI	# of subjects with BPH
		(years ± std)	(% female)	(kg/m2 ± std)							AUC
Cases vs	137	66 ± 8	0	27 ± 4	0
Non-symptomatic	137	66 ± 8	0	27 ± 6	0						0.82 ± 0.07
Mixed	137	66 ± 8	0	27 ± 6	63						0.83 ± 0.07
TNM class T3
Group	# of Individuals	Age	Gender	BMI	# of subjects with BPH
		(years ± std)	(% female)	(kg/m2 ± std)							AUC
Cases vs	78	68 ± 7	0	27 ± 4	0
Non-symptomatic	78	68 ± 7	0	27 ± 7	0						0.76 ± 0.10
Mixed	78	68 ± 7	0	26 ± 4	37						0.82 ± 0.12
