# Supplementary material for: Infrared molecular fingerprinting of blood-based liquid biopsies for the detection of cancer
Source: eLife. 2021 Oct 26;10:e68758. doi: 10.7554/eLife.68758 (PMC8547961; doi:10.7554/eLife.68758)
Supplement: Figure 5—source data 2. [file elife-68758-fig5-data2.xlsx]

## Sheet: Tabelle1
Figure 5-source data 2 | Characteristics of the matched groups utilized for the analysis presented in Figure 5, panel e.
Characteristics of matched groups of individuals for the analysis of prostate cancer examining the relation with tumour grade score:
Tumour grade score G1
Group	# of Individuals	Age	Gender	BMI	# of subjects
		(years ± std)	(% female)	(kg/m2 ± std)	with BPH	AUC
Cases vs	49	67 ± 9	0	27 ± 4	0
Non-symptomatic	49	67 ± 9	0	27 ± 5	0	0.74 ± 0.17
Mixed	49	67 ± 9	0	27 ± 4	27	0.75 ± 0.15
Tumour grade score G2
Group	# of Individuals	Age	Gender	BMI	# of subjects
		(years ± std)	(% female)	(kg/m2 ± std)	with BPH	AUC
Cases vs	78	67 ± 9	0	26 ± 3	0
Non-symptomatic	78	67 ± 9	0	27 ± 7	0	0.83 ± 0.11
Mixed	78	67 ± 9	0	27 ± 4	39	0.84 ± 0.10
Tumour grade score G3
Group	# of Individuals	Age	Gender	BMI	# of subjects
		(years ± std)	(% female)	(kg/m2 ± std)	with BPH	AUC
Cases vs	44	69 ± 8	0	28 ± 4	0
Non-symptomatic	44	69 ± 8	0	28 ± 8	0	0.89 ± 0.11
Mixed	44	69 ± 8	0	27 ± 4	22	0.91 ± 0.10
