# Supplementary material for: Infrared molecular fingerprinting of blood-based liquid biopsies for the detection of cancer
Source: eLife. 2021 Oct 26;10:e68758. doi: 10.7554/eLife.68758 (PMC8547961; doi:10.7554/eLife.68758)
Supplement: Figure 5—source data 3. [file elife-68758-fig5-data3.xlsx]

## Sheet: Tabelle1
Figure 5-source data 3 | Characteristics of the matched groups utilized for the analysis presented in Figure 5, panel f.
Characteristics of matched groups of individuals used for the analysis of prostate cancer examining the effect of the Gleason score (Gs):
Gleason score 6
Group	# of Individuals	Age	Gender	BMI	# of subjects
		(years ± std)	(% female)	(kg/m2 ± std)	with BPH	AUC
Cases vs	62	67 ± 9	0	27 ± 5	0
Non-symptomatic	62	67 ± 9	0	27 ± 5	0	0.72 ± 0.12
Mixed	62	67 ± 9	0	27 ± 4	33	0.76 ± 0.13
Gleason score 7
Group	# of Individuals	Age	Gender	BMI	# of subjects
		(years ± std)	(% female)	(kg/m2 ± std)	with BPH	AUC
Cases vs	147	67 ± 8	0	27 ± 3	0
Non-symptomatic	147	67 ± 8	0	27 ± 5	0	0.83 ± 0.07
Mixed	147	67 ± 8	0	27 ± 6	63	0.82 ± 0.06
Gleason score 8
or greater
Group	# of Individuals	Age	Gender	BMI	# of subjects
		(years ± std)	(% female)	(kg/m2 ± std)	with BPH	AUC
Cases vs	65	70 ± 7	0	27 ± 4	0
Non-symptomatic	130	70 ± 8	0	27 ± 4	0	0.74 ± 0.12
Mixed	65	70 ± 7	0	27 ± 4	32	0.82 ± 0.13
