# Supplementary material for: Infrared molecular fingerprinting of blood-based liquid biopsies for the detection of cancer
Source: eLife. 2021 Oct 26;10:e68758. doi: 10.7554/eLife.68758 (PMC8547961; doi:10.7554/eLife.68758)
Supplement: Figure 5—source data 4. [file elife-68758-fig5-data4.xlsx]

## Sheet: Tabelle1
Figure 5-source data 4 | Characteristics of the matched groups utilized for the analysis presented in Figure 5, panel e.
Characteristics of matched groups of individuals used for the analysis of lung cancer examining the effect of the metastasis status:
Metastatic (M1)
Group	# of Individuals	Age	Gender	BMI	# of subjects with
		(years ± std)	(% female)	(kg/m2 ± std)							AUC
					COPD	Hamart.	Pneumon.	Asthma
Cases vs	44	67 ± 9	43	25 ± 5	9	0	0	2
Non-symptomatic	44	67 ± 9	43	25 ± 4	0	0	0	0			0.89 ± 0.11
Mixed	44	67 ± 9	43	26 ± 5	29	9	0	2			0.75 ± 0.15
Non-metastatic (M0)
Group	# of Individuals	Age	Gender	BMI	# of subjects with
		(years ± std)	(% female)	(kg/m2 ± std)							AUC
					COPD	Hamart.	Pneumon.	Asthma
Cases vs	77	69 ± 10	35	26 ± 5	29	0	0	2
Non-symptomatic	74	69 ± 10	36	26 ± 7	0	0	0	0			0.81 ± 0.11
Mixed	75	69 ± 10	36	27 ± 5	46	0	0	7			0.62 ± 0.12
